# Supplementary material for: Effects of Insulin on the Metabolic Control of Hepatic Gluconeogenesis In Vivo
Source: PubMed Central journal article supplement — Diabetes. 2009 Sep 15;58(12):2766–75. doi: 10.2337/db09-0328 (PMC2780867; doi:10.2337/db09-0328), 2009-09-15
Supplement: supp_db09-0328_DB09-0328_online_appendix.pdf [file supp_db09-0328_DB09-0328_online_appendix.pdf]

## SUPPLEMENTAL MATERIALS

### Effects of Insulin on the Metabolic Control of Hepatic Gluconeogenesis in vivo

Dale S. Edgerton, Christopher J. Ramnanan, Carrie A. Everett-Grueter, Kathryn M. S. Johnson, Margaret Lautz, Doss W. Neal, Phillip E. Williams, Alan D. Cherrington

#### SUPPLEMENTAL RESEARCH DESIGN AND METHODS

**RNA extraction, cDNA synthesis and real-time PCR procedures.** Total RNA was extracted by homogenizing 50 mg of canine liver in 1 mL of Tri-reagent (Sigma, St. Louis, MO) following the manufacturer's instructions. RNA was further purified using the Qiagen RNEasy kit (Qiagen, Valencia, CA). RNA purity was verified based on A260/A280 ratios greater than 1.8, and RNA integrity was verified using ethidium bromide-stained agarose gels. First strand cDNA was synthesized from total RNA using the High Capacity reverse transcription kit (ABI, Foster City, CA) as per manufacturer's directions and cDNA was stored at -20°C until use. Primers were designed and analyzed using the Primer3 and mfold programs (BioRad, Hercules, CA). Real-time PCR primer specificity was determined by BLAST analysis. Primer pairs are listed in Supplemental Table 1. Primer efficiencies were validated to be between 91-96% for each primer pair, and primer specificity was confirmed by both melt curve analysis and 1% agarose gel electrophoresis (each of which revealed one product). Real-time PCR was performed using a BioRad iCycler Detection System with SYBR green fluorophore. Reactions were initiated by adding 0.25 µg of cDNA template to 50 µL total reaction mix. The PCR protocol included denaturation at 95°C for 3 min followed by 40 cycles of amplification (95°C for 30 s, anneal at 56°C for 30 s, elongate at 72°C for 30 s). Melt curve analysis was performed after every run and samples were run in duplicate. Expression of test genes were normalized relative to the housekeeping gene hypoxanthine phosphoribosyl transferase 1 (HPRT1) using the Livak method as previously described (1). Initial experiments validated HPRT1 as a housekeeping gene relative to cyclophilin. Analysis of data was performed using iCycler iQ Optical System Software Version 5.0 (BioRad).

**SDS-PAGE and Western blotting procedures.** Soluble protein from frozen canine liver was extracted, subjected to electrophoresis, and transferred to nitrocellulose, essentially as described by Ramnanan et al. (2). Nitrocellulose membranes, SDS-PAGE and wet-transfer reagents were supplied by Invitrogen (Carlsbad, CA). Cellular fractionation (to prepare nuclear- and cytoplasmic-enriched fractions to assay FOXO-1 localization) was performed as per Morris et al. (3). Immuno detection was performed as described (2). Primary and secondary antibodies were supplied by Cell Signaling (Danvers, MA), with the exception of sheep anti-PEPCK (gift from Dr. D.K. Granner, Vanderbilt University Medical Center), sheep anti-GK (gift from Dr. M. Shiota, Vanderbilt University Medical Center), and donkey anti-sheep secondary antibody (Sigma). Incubation times with primary and secondary antibodies, and antibody dilutions, were optimized for each test protein. Proteins were visualized using ECL Plus Western detection reagents (GE Healthcare, Piscataway, NJ, USA) following manufacturer's protocols and ECL signals were detected after exposure to BioMax Light X-ray films (Kodak, Chalon-sur-Saone,

France). Initial experiments validated that immunoreactive proteins were within the linear range of ECL detection. Protein band densities were quantified using ImageJ software (<http://rsb.info.nih.gov/ij/>). Test protein bands were normalized for lane-to-lane variation in loading using actin as previously described (2).

**Fructose-2,6-bisphosphate (F2,6P<sub>2</sub>) assay.** Liver F2,6P<sub>2</sub> was extracted as previously described (4). Briefly, 50 mg of frozen canine liver was homogenized in 1 mL of 50 mM NaOH. Extracts were heated for 5 minutes at 80°C, cooled, and neutralized by addition of ice-cold 1 M acetic acid in the presence of 20 mM HEPES. After centrifugation at 8000 g for 10 minutes, supernatants were assayed for F2,6P<sub>2</sub> using the potato 6-phosphofructokinase-1 (PFK-1) activation method of Van Schaftingen et al. (5). Samples were incubated in buffer containing potato PFK-1 (a kind gift from Dr. Alex Lange, University of Minnesota), 50 mM Tris-HCl, pH 8.0, 5 mM MgCl<sub>2</sub>, 0.15 mM NADH, 5 mM fructose-6-phosphate, and 1 U/mL each of the linking enzymes glycerol-3-phosphate dehydrogenase, triosephosphate isomerase, and aldolase. The reaction was then initiated by addition of 1 mM sodium pyrophosphate. Activity was measured by detecting the rate of NADH oxidation at 340 nM at 25°C. Initial assays validated linearity with respect to extract volume, assay time, and substrate concentration. A standard curve was prepared assaying PFK-1 activity in the same conditions with known amounts of F2,6P<sub>2</sub>, which was another gift from Dr. Lange.

**Pyruvate kinase (PK) assay.** Extraction and assay of PK was performed following established protocols (6; 7). Frozen canine tissue was homogenized in buffer containing 50 mM Tris-HCl, pH 7.5, 1 mM EDTA, 1 mM EGTA, 200 mM NaCl, 50 mM NaF, 10% glycerol, and 10 mM β-mercaptoethanol; a few crystals of phenylmethylsulphonyl fluoride and 5 μL/mL each of Sigma Protease Inhibitor Cocktail and Phosphatase Inhibitor Cocktails I and II were added immediately prior to homogenization. Homogenates were centrifuged 10 000 g X 20 min at 4°C, and supernatants were desalted by centrifugation through G-25 Sephadex columns as done previously (6). Desalted extracts were assayed for PK activity at 25°C in buffer containing 50 mM Tris-HCl, pH 7.2, 5 mM phosphoenolpyruvate, 5 mM ADP, 0.2 mM NADH, 10 mM MgCl<sub>2</sub>, 100 mM KCl, and 1 U/mL of lactate dehydrogenase. Initial assays determined linearity with respect to time, substrate, and extract volume. Activity was monitored by detecting rate of NADH oxidation at 340 nM, and expressed as U/mg protein, where 1 U represents as 1 μmol pyruvate formed (or NADH oxidized) per minute, and mg protein was determined via the Biorad protein assay as done previously (2).

**Supplemental Table 1. Nucleotide sequences of dog-specific primers for Real-Time PCR.**

| Gene        | Primer  | Sequence (5'-3')          | Temp. (°C) | Accession Number |
|-------------|---------|---------------------------|------------|------------------|
| PEPCK       | Forward | AGCTTTCAATGCCCGATTTCAGG   | 57         | XM_543068        |
|             | Reverse | TCAGCTCGATGCCGATCTTTGACA  |            |                  |
| G6Pase      | Forward | TGAAACTTTTCAGCCACATCCG    | 56         | XP_855553        |
|             | Reverse | GCAGGTAAAATCCAAGTGCGAA    |            |                  |
| GK          | Forward | CAGAGGGGACTTTGAAATG       | 57         | XM_846042        |
|             | Reverse | ATGAATCCTTACCCACAATC      |            |                  |
| HPRT        | Forward | AGCTTGCTGGTGAAAAGGAC      | 55         | L_77488          |
|             | Reverse | TTATAGTCAAGGGCATATCC      |            |                  |
| Cyclophilin | Forward | GAAGGGATTTCGGTTACAAAGGTTC | 56         | AF_243140        |
|             | Reverse | ATCAAACCTTCTCCCCGTAGATGG  |            |                  |

**SUPPLEMENTAL REFERENCES**

1. Livak KJ, Schmittgen TD: Analysis of relative gene expression data using real-time quantitative PCR and the 2<sup>-</sup>(-Delta Delta C(T)) Method. *Methods* 25:402-408, 2001
2. Ramnanan CJ, Groom AG, Storey KB: Akt and its downstream targets play key roles in mediating dormancy in land snails. *Comp Biochem Physiol B Biochem Mol Biol*, 2007
3. Morris TA, Jafari N, Rice AC, Vasconcelos O, DeLorenzo RJ: Persistent increased DNA-binding and expression of serum response factor occur with epilepsy-associated long-term plasticity changes. *J Neurosci* 19:8234-8243, 1999
4. Wu C, Khan SA, Peng LJ, Lange AJ: Roles for fructose-2,6-bisphosphate in the control of fuel metabolism: beyond its allosteric effects on glycolytic and gluconeogenic enzymes. *Adv Enzyme Regul* 46:72-88, 2006
5. Van Schaftingen E, Lederer B, Bartrons R, Hers HG: A kinetic study of pyrophosphate: fructose-6-phosphate phosphotransferase from potato tubers. Application to a microassay of fructose 2,6-bisphosphate. *Eur J Biochem* 129:191-195, 1982
6. Brooks SP, Storey KB: Regulation of glycolytic enzymes during anoxia in the turtle *Pseudemys scripta*. *Am J Physiol* 257:R278-283, 1989
7. Storey KB: Regulation of liver metabolism by enzyme phosphorylation during mammalian hibernation. *J Biol Chem* 262:1670-1673, 1987
